# Supplementary material for: Analysis of 13 haloacetamide DBPs in drinking water using a highly sensitive LC-MS/MS method
Source: Royal Society of Chemistry journal article supplement (doi:10.1039/d2ew00781a), 2023-01-01
Supplement: d2ew00781a1.pdf [file d2ew00781a1.pdf]

## Supplementary Information

Analysis of 13 haloacetamide DBPs in drinking water using a highly sensitive LC-MS/MS method

**Table S1 Characteristics of the HAcAms Analyzed in this Study**

| No | HAcAms                 | Abbreviation | CAS <sup>a</sup> NO | Chemical Formula                                   | MW <sup>b</sup> | Source and Purity       |
|----|------------------------|--------------|---------------------|----------------------------------------------------|-----------------|-------------------------|
| 1  | 2-Chloroacetamide      | CACAm        | 79-07-2             | C <sub>2</sub> H <sub>4</sub> ClNO                 | 93.51           | Sigma-Aldrich,98%       |
| 2  | 2-Bromoacetamide       | BACAm        | 683-57-8            | C <sub>2</sub> H <sub>4</sub> BrNO                 | 137.96          | Sigma-Aldrich,98%       |
| 3  | Iodoacetamide          | IACAm        | 144-48-9            | C <sub>2</sub> H <sub>4</sub> INO                  | 184.96          | Sigma-Aldrich,99%       |
| 4  | 2,2-Dichloroacetamide  | DCACAm       | 683-72-7            | C <sub>2</sub> H <sub>3</sub> Cl <sub>2</sub> NO   | 127.96          | J&K,98%                 |
| 5  | Trichloroacetamide     | TCACAm       | 594-65-0            | C <sub>2</sub> H <sub>2</sub> Cl <sub>3</sub> NO   | 162.4           | Sigma-Aldrich,99%       |
| 6  | Diiodoacetamide        | DIACAm       | 5875-23-0           | C <sub>2</sub> H <sub>3</sub> I <sub>2</sub> NO    | 310.85          | CanSyn Chem Corp.,> 99% |
| 7  | Tribromoacetamide      | TBACAm       | 594-47-8            | C <sub>2</sub> H <sub>2</sub> Br <sub>3</sub> NO   | 295.75          | CanSyn Chem Corp.,> 99% |
| 8  | Bromiodoacetamide      | BIIACAm      | 62872-36-0          | C <sub>2</sub> H <sub>3</sub> BrINO                | 263.856         | CanSyn Chem Corp.,> 85% |
| 9  | Dibromochloroacetamide | DBCACAm      | 855878-13-6         | C <sub>2</sub> H <sub>2</sub> Br <sub>2</sub> ClNO | 251.305         | CanSyn Chem Corp.,> 99% |
| 10 | Chloriodoacetamide     | CIACAm       | 62872-35-9          | C <sub>2</sub> H <sub>3</sub> ClINO                | 219.405         | CanSyn Chem Corp.,> 99% |
| 11 | Bromodichloroacetamide | BDCACAm      | 98137-00-9          | C <sub>2</sub> H <sub>2</sub> BrCl <sub>2</sub> NO | 206.85          | CanSyn Chem Corp.,> 99% |
| 12 | Dibromoacetamide       | DBACAm       | 598-70-9            | C <sub>2</sub> H <sub>3</sub> Br <sub>2</sub> NO   | 216.86          | CanSyn Chem Corp.,> 99% |
| 13 | Bromochloroacetamide   | BCACAm       | 62872-34-8          | C <sub>2</sub> H <sub>3</sub> BrClNO               | 172.41          | CanSyn Chem Corp.,> 99% |

<sup>a</sup> CAS = chemical abstracts service; <sup>b</sup> MW = molecular weight;

**Table S2 Detailed information of 15 WTPs considered in this study**

| WTPs  | District | Water source       | Advanced treatment<br>(ozone-BAC process) | Disinfectant |
|-------|----------|--------------------|-------------------------------------------|--------------|
| WTP1  | Wuxi     | Yangtze River      | Yes                                       | chlorine     |
| WTP2  | Wuxi     | Taihu Lake         | Yes                                       | chlorine     |
| WTP3  | Wuxi     | Taihu Lake         | Yes                                       | chlorine     |
| WTP4  | Wuxi     | Taihu Lake         | Yes                                       | chlorine     |
| WTP5  | Jiangyin | Yangtze River      | No                                        | chlorine     |
| WTP6  | Jiangyin | Yangtze River      | No                                        | chlorine     |
| WTP7  | Jiangyin | Yangtze River      | No                                        | chlorine     |
| WTP8  | Yixing   | Hengshan Reservoir | No                                        | chlorine     |
| WTP9  | Yixing   | Dahanjie Reservoir | No                                        | chlorine     |
| WTP10 | Yixing   | Longzhu Reservoir  | No                                        | chlorine     |
| WTP11 | Yixing   | Hengshan Reservoir | Yes                                       | chlorine     |
| WTP12 | Yixing   | Youche Reservoir   | No                                        | chlorine     |
| WTP13 | Kunshan  | Kuilei Lake        | No                                        | Chloramine   |
| WTP14 | Kunshan  | Kuilei Lake        | No                                        | Chloramine   |
| WTP15 | Kunshan  | Kuilei Lake        | No                                        | Chloramine   |

**Table S3 Precision and accuracy of this method**

| Analyte | LOD<br>( $\mu\text{g L}^{-1}$ ) | LOQ<br>( $\mu\text{g L}^{-1}$ ) | Target<br>concentration<br>( $\mu\text{g L}^{-1}$ ) | Intra-day ( $n = 6$ )                                 |                 |                  | Inter-day ( $n = 3$ )                                 |                 |                  |
|---------|---------------------------------|---------------------------------|-----------------------------------------------------|-------------------------------------------------------|-----------------|------------------|-------------------------------------------------------|-----------------|------------------|
|         |                                 |                                 |                                                     | Obtained<br>concentration<br>( $\mu\text{g L}^{-1}$ ) | Accuracy<br>(%) | Precision<br>(%) | Obtained<br>concentration<br>( $\mu\text{g L}^{-1}$ ) | Accuracy<br>(%) | Precision<br>(%) |
| CAcAm   | 0.010                           | 0.030                           | 0.500                                               | 0.491±0.010                                           | 98.2            | 2.6              | 0.484±0.020                                           | 96.8            | 4.1              |
|         |                                 |                                 | 1.000                                               | 0.995±0.013                                           | 99.5            | 1.6              | 0.973±0.015                                           | 97.3            | 3.2              |
|         |                                 |                                 | 10.0                                                | 8.940±0.10                                            | 89.4            | 1.4              | 9.02±0.12                                             | 90.2            | 2.8              |
| BAcAm   | 0.010                           | 0.030                           | 0.500                                               | 0.445±0.008                                           | 89.0            | 2.7              | 0.442±0.016                                           | 88.4            | 3.5              |
|         |                                 |                                 | 1.000                                               | 0.941±0.014                                           | 94.1            | 1.7              | 0.918±0.015                                           | 91.8            | 2.6              |
|         |                                 |                                 | 10.0                                                | 9.130±0.09                                            | 91.3            | 1.1              | 9.05±0.11                                             | 90.5            | 2.0              |
| IAcAm   | 0.002                           | 0.006                           | 0.500                                               | 0.515±0.012                                           | 103             | 2.4              | 0.505±0.020                                           | 101             | 3.8              |
|         |                                 |                                 | 1.000                                               | 1.120±0.015                                           | 112             | 1.7              | 1.09±0.018                                            | 109             | 2.5              |
|         |                                 |                                 | 10.0                                                | 9.180±0.09                                            | 91.8            | 1.2              | 8.98±0.10                                             | 89.8            | 2.2              |
| DCAcAm  | 0.020                           | 0.060                           | 0.500                                               | 0.590±0.013                                           | 118             | 2.8              | 0.56±0.024                                            | 112             | 4.9              |
|         |                                 |                                 | 1.000                                               | 1.060±0.018                                           | 106             | 2.1              | 1.010±0.023                                           | 101             | 3.5              |
|         |                                 |                                 | 10.0                                                | 8.460±0.08                                            | 84.6            | 1.5              | 8.53±0.14                                             | 85.3            | 2.7              |
| CBAcAm  | 0.010                           | 0.030                           | 0.500                                               | 0.486±0.010                                           | 97.2            | 2.8              | 0.478±0.014                                           | 95.6            | 3.3              |
|         |                                 |                                 | 1.000                                               | 0.968±0.008                                           | 96.8            | 1.6              | 0.957±0.012                                           | 95.7            | 2.4              |
|         |                                 |                                 | 10.0                                                | 8.720±0.10                                            | 87.2            | 1.2              | 8.61±0.12                                             | 86.1            | 2.1              |
| DBAcAm  | 0.020                           | 0.060                           | 0.500                                               | 0.475±0.009                                           | 95.0            | 2.9              | 0.471±0.012                                           | 94.2            | 3.4              |
|         |                                 |                                 | 1.000                                               | 1.070±0.015                                           | 107             | 2.5              | 1.04±0.018                                            | 104             | 2.8              |
|         |                                 |                                 | 10.0                                                | 9.470±0.09                                            | 94.7            | 1.5              | 9.33±0.11                                             | 93.3            | 2.2              |
| CIAcAm  | 0.002                           | 0.006                           | 0.500                                               | 0.423±0.010                                           | 84.6            | 2.4              | 0.414±0.020                                           | 82.8            | 3.9              |
|         |                                 |                                 | 1.000                                               | 1.080±0.016                                           | 108             | 2.0              | 1.05±0.018                                            | 105             | 2.8              |
|         |                                 |                                 | 10.0                                                | 8.980±0.11                                            | 89.8            | 1.1              | 9.04±0.15                                             | 90.4            | 2.5              |

|         |       |       |       |             |      |     |             |      |     |
|---------|-------|-------|-------|-------------|------|-----|-------------|------|-----|
|         |       |       | 0.500 | 0.515±0.011 | 103  | 2.1 | 0.505±0.018 | 101  | 3.6 |
| BIAcAm  | 0.003 | 0.009 | 1.000 | 1.080±0.013 | 108  | 1.9 | 1.05±0.018  | 105  | 2.9 |
|         |       |       | 10.0  | 10.680±0.08 | 107  | 1.7 | 10.19±0.09  | 102  | 2.2 |
|         |       |       | 0.500 | 0.475±0.013 | 95.0 | 2.6 | 0.484±0.015 | 96.8 | 3.2 |
| DIAcAm  | 0.001 | 0.003 | 1.000 | 1.170±0.012 | 117  | 2.3 | 1.13±0.015  | 113  | 2.9 |
|         |       |       | 10.0  | 9.90±0.08   | 99.0 | 1.9 | 9.75±0.09   | 97.5 | 2.4 |
|         |       |       | 0.500 | 0.435±0.011 | 87.0 | 3.6 | 0.431±0.019 | 86.2 | 5.0 |
| TCAcAm  | 0.001 | 0.003 | 1.000 | 0.905±0.015 | 90.5 | 1.8 | 0.906±0.016 | 90.6 | 2.3 |
|         |       |       | 10.0  | 9.960±0.09  | 99.6 | 1.3 | 9.511±0.09  | 95.1 | 2.0 |
|         |       |       | 0.500 | 0.487±0.010 | 97.4 | 2.9 | 0.479±0.019 | 95.8 | 4.3 |
| BDCAcAm | 0.002 | 0.006 | 1.000 | 0.902±0.009 | 90.2 | 1.8 | 0.884±0.015 | 88.4 | 3.5 |
|         |       |       | 10.0  | 8.920±0.10  | 89.2 | 1.3 | 8.65±0.11   | 86.5 | 2.3 |
|         |       |       | 0.500 | 0.535±0.011 | 107  | 2.6 | 0.52±0.020  | 104  | 3.7 |
| DBCcAm  | 0.003 | 0.009 | 1.000 | 0.866±0.012 | 86.6 | 1.6 | 0.854±0.017 | 85.4 | 3.1 |
|         |       |       | 10.0  | 8.520±0.08  | 85.2 | 1.2 | 8.402±0.12  | 84   | 2.6 |
|         |       |       | 0.500 | 0.540±0.013 | 108  | 3.2 | 0.525±0.025 | 105  | 5.7 |
| TBAcAm  | 0.100 | 0.300 | 1.000 | 1.110±0.020 | 111  | 2.6 | 1.07±0.020  | 107  | 3.4 |
|         |       |       | 10.0  | 9.020±0.08  | 90.2 | 1.1 | 8.68±0.10   | 86.8 | 3   |

---

**Table S4 MRM parameters of 13 HAcAms**

| HAcAm   | Precursor Ions<br>(m/z) | Daughter Ions<br>(m/z) | DP<br>(V) | CE<br>(V) | CXP<br>(V) |
|---------|-------------------------|------------------------|-----------|-----------|------------|
| CAcAm   | 94                      | 58.1                   | 80        | 18        | 8          |
|         | 94                      | 77                     | 80        | 20        | 8          |
| BAcAm   | 138                     | 59.1                   | 60        | 26        | 7          |
|         | 140                     | 59                     | 60        | 24        | 7          |
| CBAcAm  | 171.9                   | 92.9                   | 60        | 23        | 10         |
|         | 174                     | 93                     | 50        | 24        | 10         |
| IAcAm   | 186                     | 59.1                   | 45        | 21        | 9          |
|         | 186                     | 43                     | 45        | 51        | 9          |
| DBAcAm  | 218                     | 137                    | 95        | 24        | 10         |
|         | 218                     | 107.9                  | 95        | 33        | 10         |
| CIAcAm  | 220                     | 93                     | 40        | 19        | 15         |
| BIAcAm  | 263.9                   | 137                    | 65        | 27        | 23         |
|         | 265.9                   | 139                    | 65        | 27        | 23         |
| TBAcAm  | 295.8                   | 216.9                  | 30        | 28        | 8          |
|         | 297.8                   | 217                    | 30        | 27        | 8          |
| DIAcAm  | 311.9                   | 184.9                  | 45        | 24        | 10         |
|         | 311.9                   | 167.9                  | 45        | 43        | 10         |
| DCAcAm  | 128                     | 64.1                   | 60        | 24        | 10         |
|         | 128                     | 92                     | 60        | 17        | 10         |
| TCAcAm  | 159.9                   | 116.9                  | -35       | -13       | -15        |
| BDCAcAm | 205.8                   | 162.8                  | -30       | -12       | -16        |
|         | 205.8                   | 42                     | -30       | -14       | -16        |
| DBCacAm | 249.8                   | 206.8                  | -20       | -12       | -12        |
|         | 249.8                   | 78.9                   | -20       | -28       | -12        |

**Table S5 Comparison of HAcAms in drinking water disinfected by different disinfection agents ( $\mu\text{g L}^{-1}$ )**

| HAcAms  | Mean $\pm$ SD           |                         | $P^a$                  | Medium(P25,P75)         |                        | $P^c$                 |
|---------|-------------------------|-------------------------|------------------------|-------------------------|------------------------|-----------------------|
|         | Chlorination<br>n       | Chloramination<br>ion   |                        | Chlorination            | Chloramination         |                       |
| CAcAm   | 0.0434 $\pm$ 0.0<br>030 | 0.2918 $\pm$ 0.06<br>91 | 7.15 $\times 10^{-10}$ | 0.041(0.027,0.0<br>57)  | 0.179(0.099,0.<br>562) | 5.91 $\times 10^{-6}$ |
| BacAm   | 0.0182 $\pm$ 0.0<br>017 | 0.0568 $\pm$ 0.00<br>44 | 1.42 $\times 10^{-11}$ | 0.016(0.013,0.0<br>24)  | 0.058(0.050,0.<br>068) | 3.28 $\times 10^{-5}$ |
| CBAcAm  | 0.2987 $\pm$ 0.0<br>451 | 0.7367 $\pm$ 0.11<br>29 | 1.13 $\times 10^{-4}$  | 0.156(0.084,0.0<br>398) | 0.916(0.378,1.<br>030) | 0.0027                |
| IAcAm   | 0.0158 $\pm$ 0.0<br>072 | 0.1209 $\pm$ 0.01<br>99 | 4.30 $\times 10^{-6}$  | 0.004(0.002,0.0<br>14)  | 0.090(0.068,0.<br>178) | 0.0003                |
| DBAcAm  | 0.0973 $\pm$ 0.0<br>177 | 0.3540 $\pm$ 0.05<br>73 | 4.71 $\times 10^{-7}$  | 0.051(0.003,0.1<br>41)  | 0.420(0.190,0.<br>523) | 0.0002                |
| CIAcAm  | 0.0191 $\pm$ 0.0<br>056 | 0.0475 $\pm$ 0.01<br>02 | 0.0116                 | 0.011(0.002,0.0<br>18)  | 0.049(0.018,0.<br>065) | 0.0059                |
| BIAcAm  | 0.0037 $\pm$ 0.0<br>027 | 0.0060 $\pm$ 0.00<br>50 | 0.68                   | 0.002(0,0.009)          | 0.006(0.001,0.<br>011) | 0.5637                |
| TBAcAm  | 0.1086 $\pm$ 0.0<br>135 | 0.0933 $\pm$ 0.01<br>31 | 0.6016                 | 0.091(0.057,0.1<br>44)  | 0.082(0.069,0.<br>108) | 0.9502                |
| DIAcAm  | 0.0136 $\pm$ 0.0<br>052 | 0.0073 $\pm$ 0.00<br>46 | 0.3979                 | 0.009(0.001,0.0<br>29)  | 0.002(0.002,0.<br>006) | 0.8973                |
| DCAcAm  | 0.6333 $\pm$ 0.0<br>756 | 1.892 $\pm$ 0.329<br>5  | 4.35 $\times 10^{-7}$  | 0.480(0.203,0.9<br>75)  | 1.872(0.714,2.<br>911) | 0.0006                |
| TCAcAm  | ND <sup>b</sup>         | ND <sup>b</sup>         | ND <sup>b</sup>        | ND <sup>b</sup>         | ND <sup>b</sup>        | ND <sup>b</sup>       |
| DCBAcAm | 0.0808 $\pm$ 0.0<br>040 | 0.0973 $\pm$ 0.00<br>99 | 0.072                  | 0.073(0.065,0.0<br>92)  | 0.077(0.072,0.<br>115) | 0.0709                |
| CDBAcAm | 0.0198 $\pm$ 0.0<br>098 | 0.0393 $\pm$ 0.00<br>97 | 0.2071                 | 0.013(0.008,0.0<br>20)  | 0.043(0.025,0.<br>054) | 0.1416                |
| Total   | 1.239 $\pm$ 0.12<br>79  | 3.6033 $\pm$ 0.56<br>82 | 5.10 $\times 10^{-8}$  | 0.894(0.546,1.8<br>70)  | 4.069(1.711,5.<br>252) | 0.0003                |

<sup>a</sup> Student t-test.

<sup>b</sup> no value

<sup>c</sup> Kruskal-Wallis test
